# Supplementary material
Source: PubMed Central journal article supplement (PMC2790577)
Supplement: mmc1.pdf [file mmc1.pdf]

American Journal of Human Genetics, Volume 85

**Supplemental Data**

**Remarkably Little Variation in Proteins Encoded  
by the Y Chromosome's Single-Copy Genes,  
Implying Effective Purifying Selection**

Steve Rozen, Janet D. Marszalek, Raaji K. Alagappan, Helen Skaletsky, and David C. Page

Figure S1. Genealogical Tree of Human Y Chromosomes.

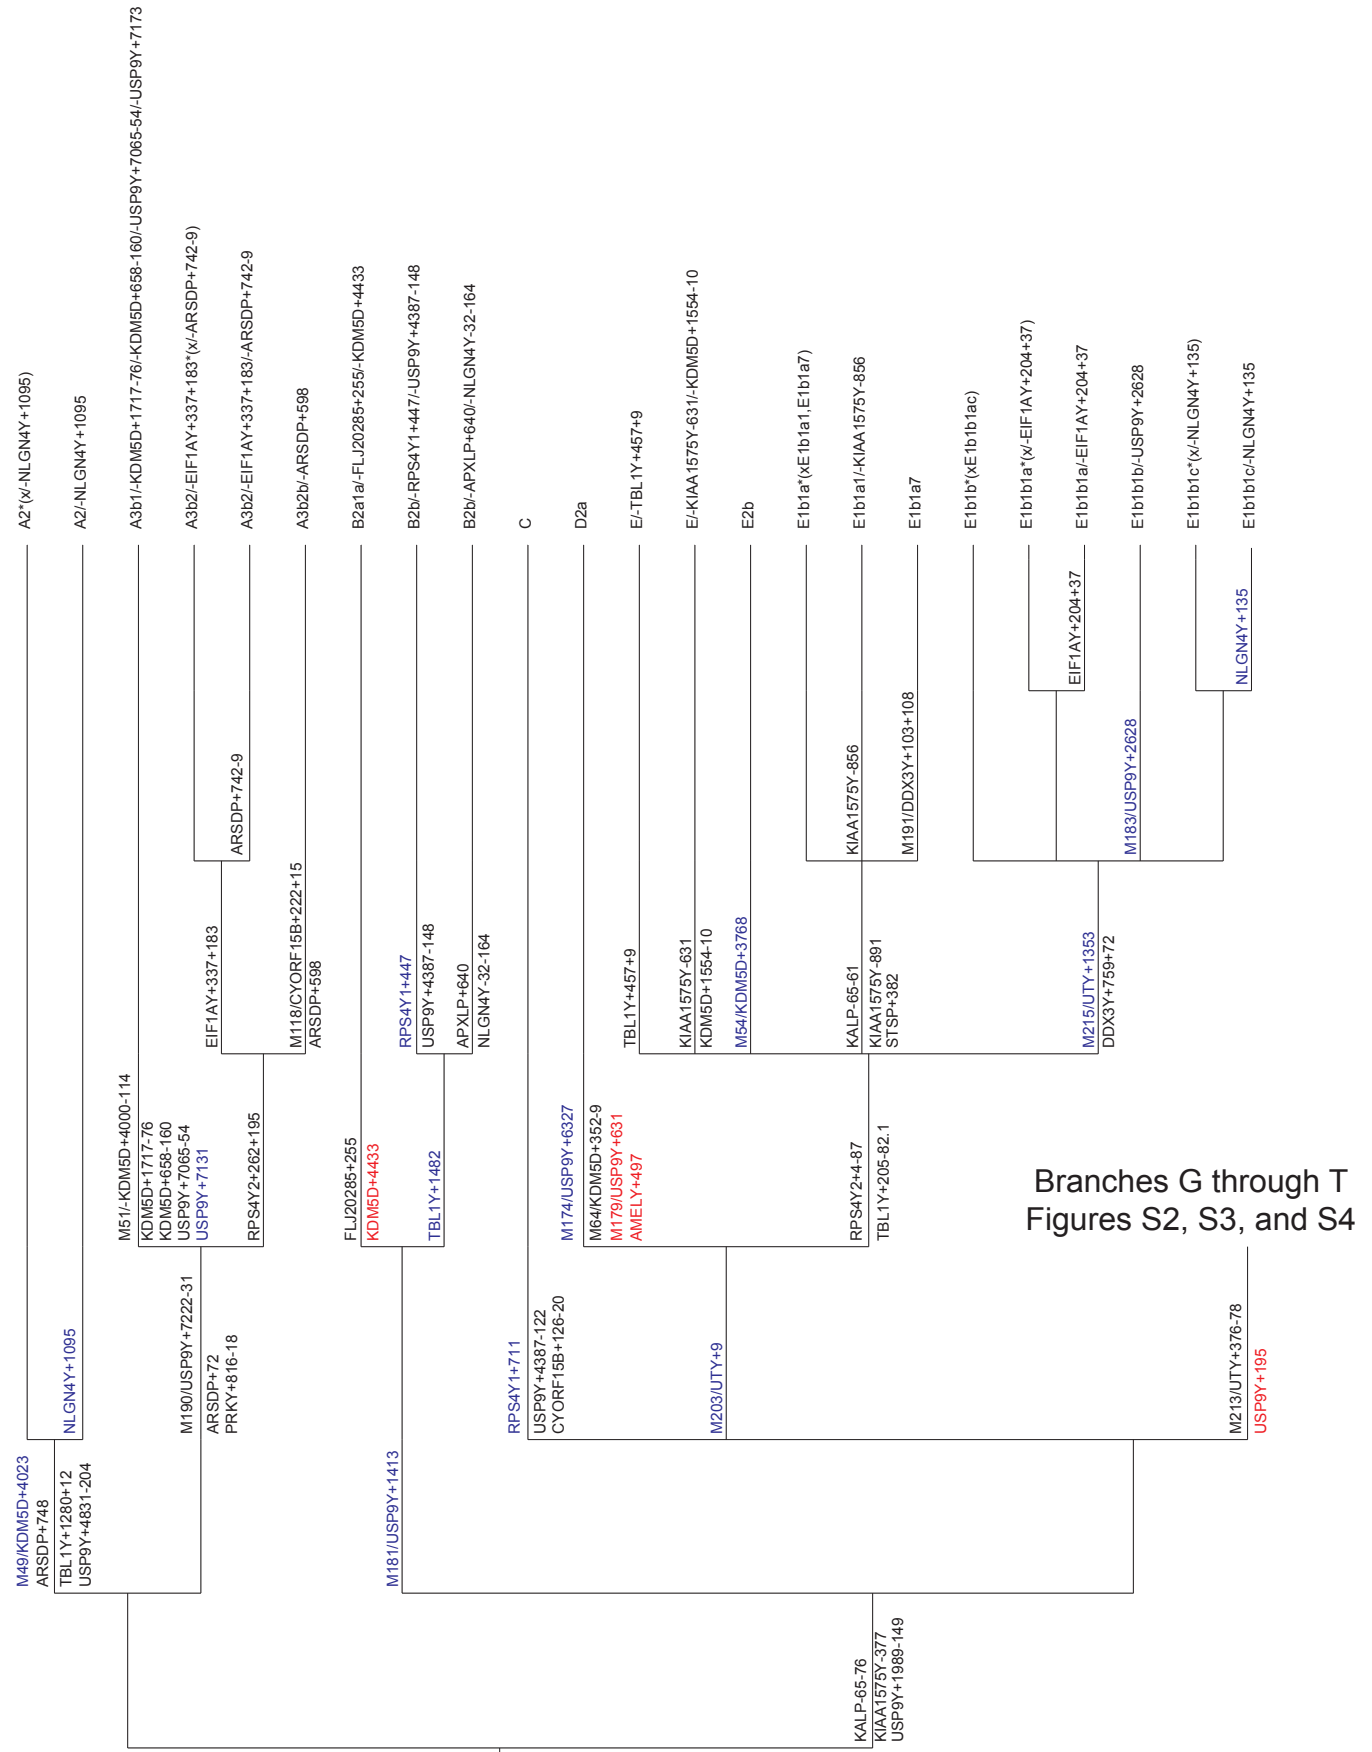

Figure S2. Genealogical Tree of Human Y Chromosomes Continued, Branches G through J.

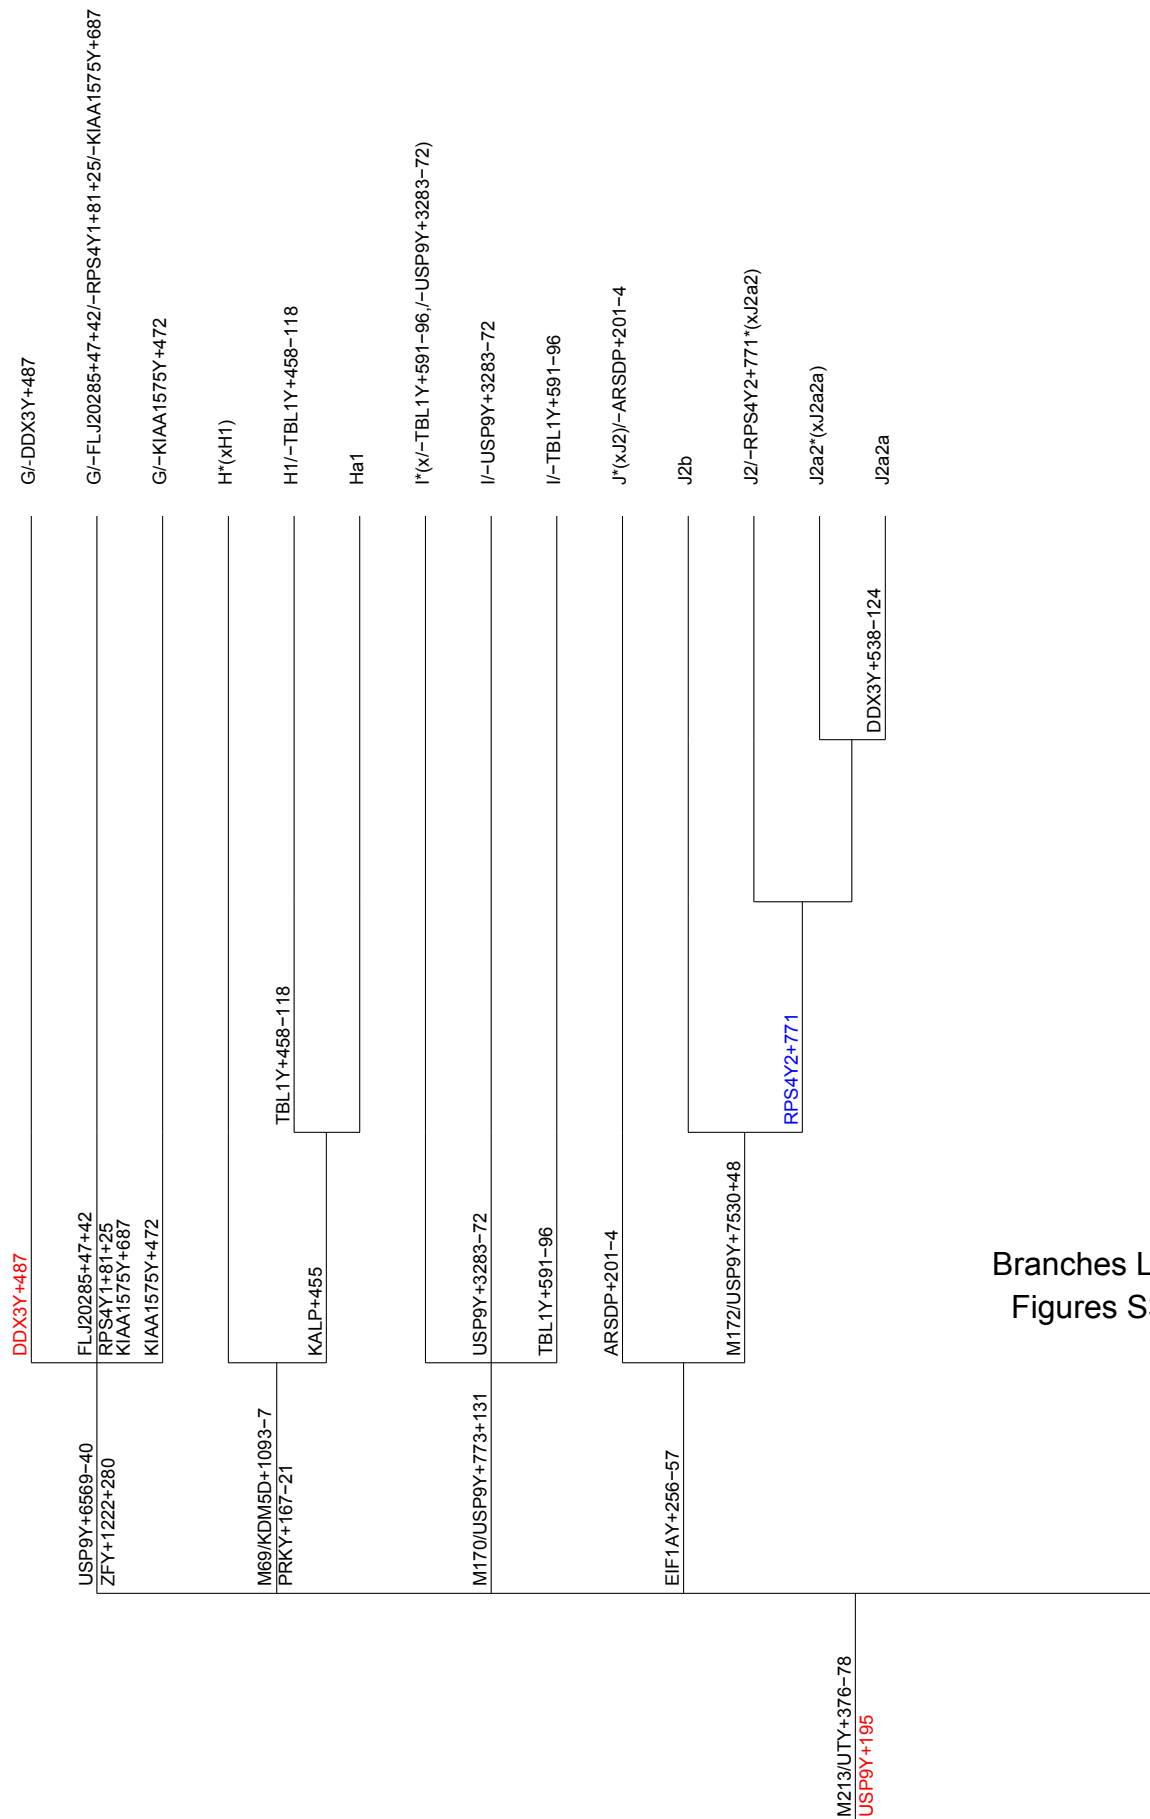

Branches L through T  
Figures S3 and S4

Figure S3. Genealogical Tree of Human Y Chromosomes Continued, Branches L through O and T.

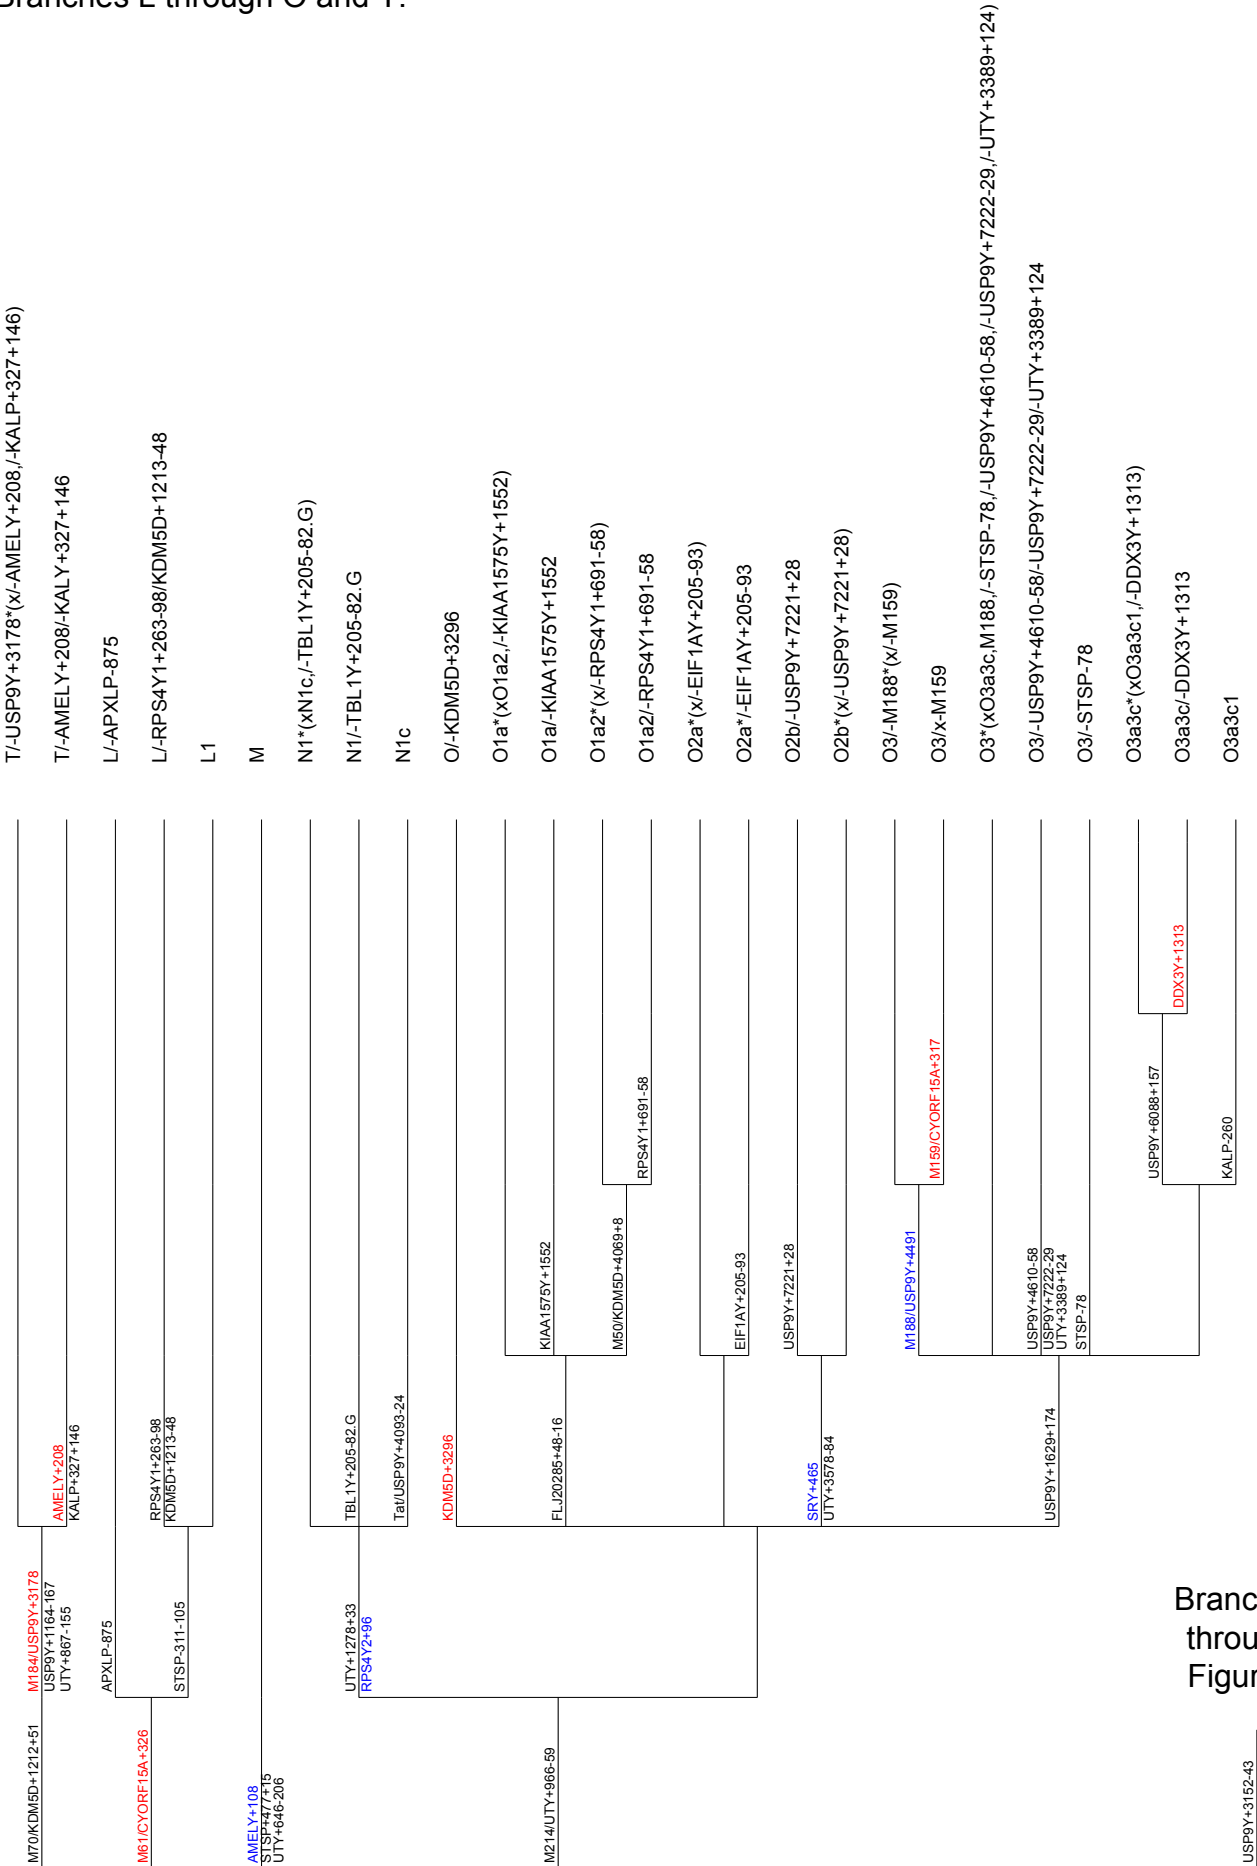

Branches P through R  
Figure S4

Figure S4. Genealogical Tree of Human Y Chromosomes Continued, Branches P, Q, and R.

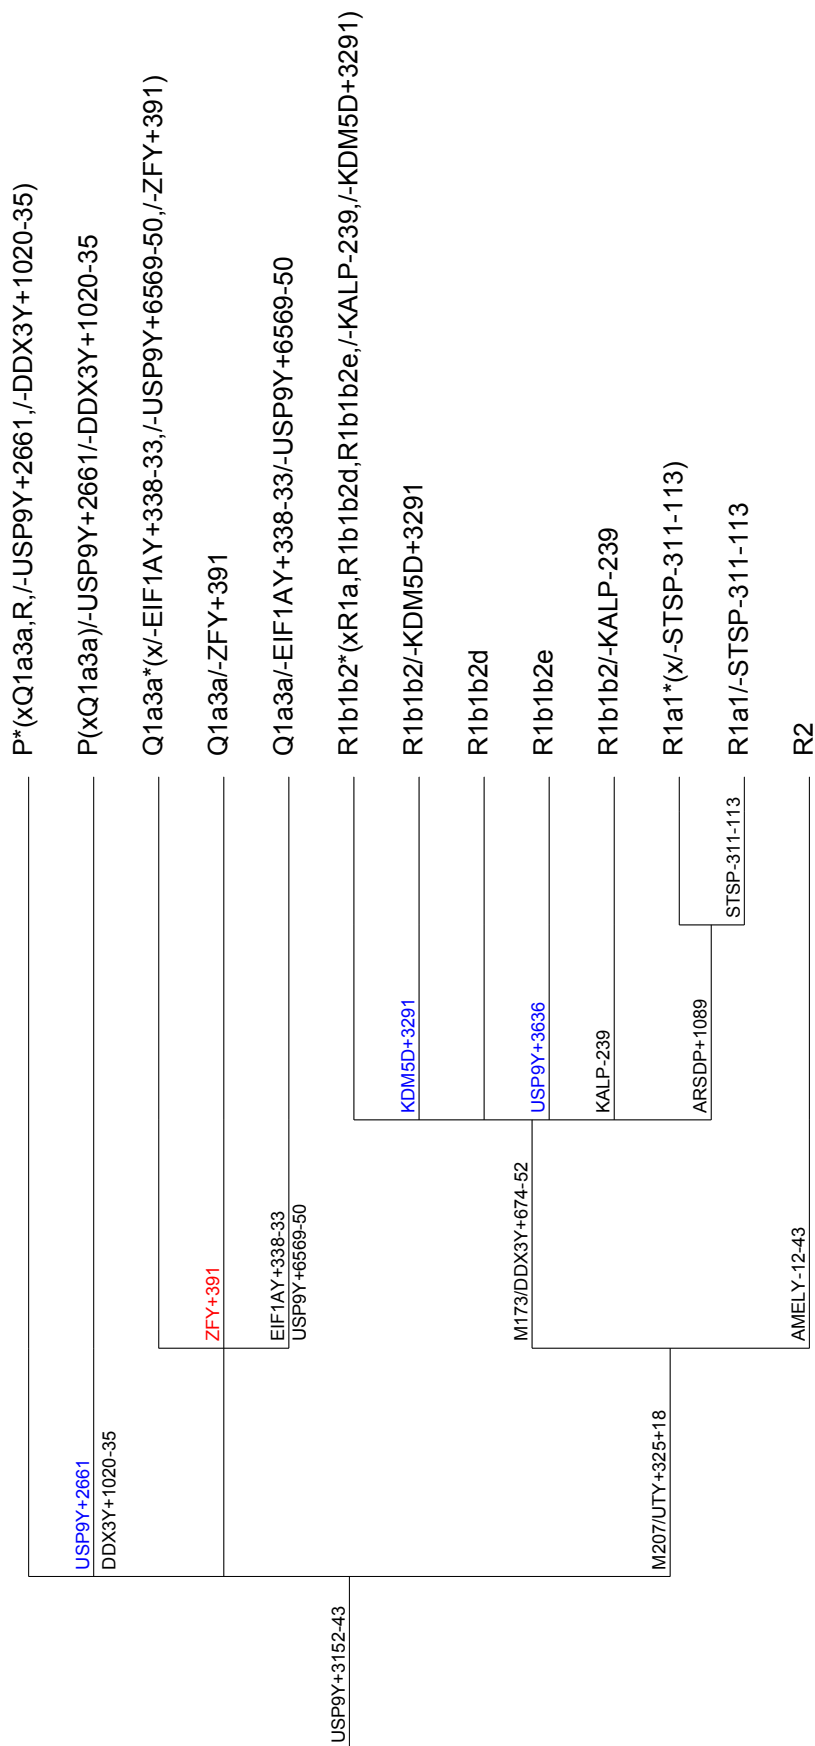

**Figure S5.** Alignments of 12 *USP9* Genes to Human *USP9Y* near the D65E Mutation.

|                                |                        |                                            |
|--------------------------------|------------------------|--------------------------------------------|
| Usp9x-isof2-Rattus-norvegicus  | EQGQGDAPPQIEDEE        | PAFPHTDLAKLDDMINRPRWVVPVLPKGELEVLLE        |
| Usp9x-Mus-musculus             | EQGQGDAPPQIEDEE        | PAFPHTDLAKLDDMINRPRWVVPVLPKGELEVLLE        |
| USP9X-isof4-Homo-sapiens       | EQGQGDAPPQLEDEE        | PAFPHTDLAKLDDMINRPRWVVPVLPKGELEVLLE        |
| USP9X-isof2-Macaca-mulatta     | EQGQGDAPPQLEDEE        | PAFPHTDLAKLDDMINRPRWVVPVLPKGELEVLLE        |
| USP9X-isof3-Equus-caballus     | EQGQGDAPPQLEDEE        | PAFPHTDLAKLDDMINRPRWVVPVLPKGELEVLLE        |
| USP9-isof3-Monodelphis-domesti | EQGQGDAPPQLEDEE        | PAFPHTDLAKLDDMINRPRWVVPVLPKGELEVLLE        |
| USP9-isof1-Ornithorhynchus-ana | EQGQGDAPPQLEDEE        | PAFPHTDLAKLDDMINRPRWVVPVLPKGELEVLLE        |
| USP9-isof1-Gallus-gallus       | EQGQGDAPPQLEDEE        | PAFPHTDLAKLDDMINRPRWVVPVLPKGELEVLLE        |
| USP9-Taeniopygia-guttata       | EQGQADAPPQLEDEE        | PAFPHTDLAKLDDMINRPRWVVPVLPKGELEVLLE        |
| USP9-Danio-rerio               | DQGQGDSPTPLEEEE        | PAFPHTELANLDDMINRPRWVVPVLPKGELEVLLE        |
| USP9Y-Bos-taurus               | EQGQGDAPPQHEDEE        | PAFPHADLAKLDDMINRPRWVVPVLPKGELEVLLE        |
| <b>USP9Y-Homo-sapiens</b>      | <b>EQGQGDAPPQHEDED</b> | <b>PAFPHTELANLDDMINRPRWVVPVLPKGELEVLLE</b> |
| Usp9y-Mus-musculus             | EQGQGDAPPQHEEED        | PSFPHTDLAKLEDMINRSRWVVPVLPKGELEVLLE        |

These alignments show the preponderance of glutamic acid at sites corresponding to the human D65E mutation. Region shown corresponds to residues 51 through 100 in the human *USP9Y* sequence. Vertical rectangle indicates residue 65 in human *USP9Y*.

We selected sequences for this multiple alignment by first querying the NCBI refseq\_protein database for best matches to human *USP9Y*. We did this using the blast server (BLASTP 2.2.21+ at <http://blast.ncbi.nlm.nih.gov/Blast.cgi>) using default parameters. In instances where multiple isoforms for a given species provided good matches to human *USP9Y*, we retained only the best match. We then selected the 12 best matches to human *USP9Y* and computed a multiple alignment with clustalw2 2.0.10 (<ftp://ftp.ebi.ac.uk/pub/software/clustalw2/>) with default parameters.

**Rozen et al., Table S1.** The 105 samples that were resequenced and the MSY haplogroups <sup>a</sup> (SNP-based haplotypes) used in selecting them.

| <b>Sample identifier</b> | <b>Haplogroup <sup>a</sup> for sample selection</b> |
|--------------------------|-----------------------------------------------------|
| NA03043                  | A2                                                  |
| YCC034                   | A2                                                  |
| YCC022                   | A2                                                  |
| YCC038                   | A3b1                                                |
| Tel-Aviv-4566            | A3b2*(xA3b2b)                                       |
| Tel-Aviv-4626            | A3b2*(xA3b2b)                                       |
| NA08688A                 | A3b2*(xA3b2b)                                       |
| GM06342                  | A3b2b                                               |
| PD061                    | B2a1a                                               |
| NA10470                  | B2b                                                 |
| NA10494                  | B2b                                                 |
| WHT3552                  | C                                                   |
| WHT3474                  | C                                                   |
| NA04535                  | D2a                                                 |
| PD178                    | D2a                                                 |
| PD339                    | E*(xE2,E3ab)                                        |
| PD383                    | E*(xE2,E3ab)                                        |
| PD347                    | E2b                                                 |
| YCC037                   | E2b                                                 |
| NA02090                  | E1b1a*(xE1b1a1)                                     |
| PD091                    | E1b1a*(xE1b1a1)                                     |
| NA02064                  | E1b1a*(xE1b1a1)                                     |
| PD399                    | E1b1a1                                              |
| GM02091                  | E1b1a1                                              |
| PD123                    | E1b1b(xE1b1b1ac)                                    |
| PD196                    | E1b1b(xE1b1b1ac)                                    |
| PD111                    | E1b1b1a                                             |
| PD144                    | E1b1b1a                                             |
| WHT3159                  | E1b1b1b                                             |
| WHT3204                  | E1b1b1b                                             |
| WHT2736                  | E1b1b1c                                             |
| WHT3027                  | E1b1b1c                                             |
| PD126                    | F*(xHT)                                             |
| PD136                    | F*(xHT)                                             |
| WHT2611                  | F*(xHT)                                             |
| PD073                    | H1*(xH1a)                                           |
| PD276                    | H*(xH1)                                             |
| PD146                    | H1a                                                 |
| PD211                    | H1a                                                 |
| WHT3449                  | I                                                   |
| PD384                    | I                                                   |
| WHT1659                  | I                                                   |
| PD054                    | J*(xJ2)                                             |
| WHT3635                  | J*(xJ2)                                             |
| OXEN                     | J*(xJ2)                                             |
| PD416                    | J2*(xJ2a2,J2b)                                      |
| WHT3255                  | J2*(xJ2a2,J2b)                                      |

|          |                    |
|----------|--------------------|
| PD335    | J2b                |
| PD388    | J2b                |
| PD430    | J2a2*(J2a2a)       |
| PD437    | J2a2*(J2a2a)       |
| WHT2426  | J2a2a              |
| WHT3560  | J2a2a              |
| PD448    | T                  |
| WHT3257  | T                  |
| WHT3299  | L*(xL1)            |
| WHT3543  | L*(xL1)            |
| PD116    | L1                 |
| PD378    | L1                 |
| NA10541A | M                  |
| PD321    | N1*(xN1c)          |
| PD403    | N1*(xN1c)          |
| PD427    | N1c                |
| WHT716   | N1c                |
| PD016    | O*(xO1a,O2ab,O3)   |
| PD189    | O1a*(xO1b)         |
| PD192    | O1a*(xO1b)         |
| PD274    | O1a2               |
| PD349    | O1a2               |
| PD143    | O2a                |
| PD151    | O2a                |
| PD197    | O2b                |
| NA14819  | O2b                |
| NA11587  | O3*(xO3a3c)        |
| PD037    | O3*(xO3a3c)        |
| PD125    | O3*(xO3a3c)        |
| PD098    | O3*(xO3a3c)        |
| PD227    | O3*(xO3a3c)        |
| PD264    | O3*(xO3a3c)        |
| PD122    | O3*(xO3a3c)        |
| PD131    | O3a3c*(xO3a3c1)    |
| PD377    | O3a3c*(xO3a3c1)    |
| PD170    | O3a3c1             |
| PD284    | O3a3c1             |
| PD421    | P*(xQ1a3a,R)       |
| PD070    | P*(xQ1a3a,R)       |
| PD222    | P*(xQ1a3a,R)       |
| NA11200  | Q1a3a              |
| PD024    | Q1a3a              |
| PD386    | Q1a3a              |
| PD444    | Q1a3a              |
| WHT3242  | R1a1               |
| WHT3586  | R1a1               |
| PD041    | R1*(xR1a,R1b1b2de) |
| PD118    | R1*(xR1a,R1b1b2de) |
| PD329    | R1*(xR1a,R1b1b2de) |
| GM02294  | R1*(xR1a,R1b1b2de) |
| PD223    | R1*(xR1a,R1b1b2de) |
| PD217    | R1b1b2d            |
| Boleth   | R1b1b2d            |



|         |         |
|---------|---------|
| WHT2630 | R1b1b2e |
| PD295   | R1b1b2e |
| PD306   | R2      |
| WHT3707 | R2      |
| NA10667 | R2      |

---

<sup>a</sup> Haplogroup designations from Karafet et al. (2008), New binary polymorphisms reshape and increase resolution of the human Y chromosomal haplogroup tree. *Genome Res.* 18, 830-838.

Rozen et al., Table S2. Pseudogenes surveyed for DNA sequence variation.

| <b>Pseudogene</b> | <b>Numbers of nucleotide sites surveyed</b> |
|-------------------|---------------------------------------------|
| <i>ARSDP</i>      | 2,472                                       |
| <i>APXLP</i>      | 2,133                                       |
| <i>KALP</i>       | 3,777                                       |
| <i>STSP</i>       | 2,160                                       |
| <i>BCORP</i>      | 4,709                                       |
| <b>Total</b>      | <b>15,251</b>                               |

NOTE: Table S3 provides details of STSs (primer pairs) used to amplify pseudoexons and surrounding sequence.

**Rozen et al., Table S3.** GenBank accession numbers for STSs (PCR products) used for resequencing genes and pseudogenes. The GenBank entries provide primer pairs and reaction conditions.

| <b>STS Name<sup>a</sup></b> | <b>GenBank<br/>Accession</b> | <b>Notes</b> |
|-----------------------------|------------------------------|--------------|
| AMELY-2                     | BV678971                     |              |
| AMELY-3                     | BV678972                     |              |
| AMELY-4                     | BV678973                     |              |
| AMELY-5                     | BV678974                     |              |
| AMELY-6-1                   | BV678975                     | b            |
| AMELY-6-2                   | BV678976                     | b            |
| APXLP-3                     | BV678977                     |              |
| APXLP-4                     | BV678978                     |              |
| APXLP-4-2                   | BV679205                     | b            |
| APXLP-4-3                   | BV679206                     | b            |
| APXLP-4-4                   | BV679207                     | b            |
| APXLP-5                     | BV678979                     |              |
| ARSDP-2                     | BV678980                     |              |
| ARSDP-3                     | BV678981                     |              |
| ARSDP-4                     | BV678982                     |              |
| ARSDP-7                     | BV678983                     |              |
| ARSDP-8                     | BV678984                     |              |
| ARSDP-9                     | BV678985                     |              |
| ARSDP-10                    | BV678986                     |              |
| CYORF15A-1                  | BV678987                     |              |
| CYORF15A-2                  | BV678988                     |              |
| CYORF15A-3                  | BV678989                     |              |
| CYORF15A-4                  | BV678990                     |              |
| CYORF15B-1                  | BV678991                     |              |
| CYORF15B-2                  | BV678992                     |              |
| CYORF15B-3                  | BV678993                     |              |
| CYORF15B-4                  | BV678994                     |              |
| DDX3Y-1                     | BV678995                     |              |
| DDX3Y-2                     | BV678996                     |              |
| DDX3Y-3                     | BV678997                     |              |
| DDX3Y-4                     | BV678998                     |              |
| DDX3Y-5                     | BV678999                     |              |
| DDX3Y-6                     | BV679000                     |              |
| DDX3Y-7                     | BV679001                     |              |
| DDX3Y-8                     | BV679002                     |              |
| DDX3Y-9                     | BV679003                     |              |
| DDX3Y-10                    | BV679004                     |              |
| DDX3Y-11                    | BV679005                     |              |
| DDX3Y-12                    | BV679006                     |              |
| DDX3Y-13                    | BV679007                     |              |
| DDX3Y-14                    | BV679008                     |              |
| DDX3Y-15                    | BV679009                     |              |
| DDX3Y-16                    | BV679010                     |              |
| DDX3Y-17                    | BV679011                     |              |
| EIF1AY-1                    | BV679012                     |              |
| EIF1AY-2                    | BV679013                     |              |
| EIF1AY-3                    | BV679014                     |              |
| EIF1AY-4                    | BV679015                     |              |
| EIF1AY-5                    | BV679016                     |              |

| <b>STS Name</b> <sup>a</sup> | <b>GenBank<br/>Accession</b> | <b>Notes</b> |
|------------------------------|------------------------------|--------------|
| EIF1AY-6                     | BV679017                     |              |
| EIF1AY-7                     | BV679018                     |              |
| BCORP-9                      | BV679019                     |              |
| BCORP-10                     | BV679020                     |              |
| BCORP-12                     | BV679021                     |              |
| BCORP-13                     | BV679022                     |              |
| BCORP-14                     | BV679023                     |              |
| KALP-2                       | BV679024                     |              |
| KALP-4                       | BV679025                     |              |
| KALP-5                       | BV679026                     |              |
| KALP-6                       | BV679027                     |              |
| KALP-7                       | BV679028                     |              |
| KALP-10                      | BV679029                     |              |
| KALP-11                      | BV679030                     |              |
| KALP-12                      | BV679031                     |              |
| KALP-13                      | BV679032                     |              |
| KALP-14                      | BV679033                     |              |
| BCORP-4-1                    | BV679034                     | b            |
| BCORP-4-2                    | BV679035                     | b            |
| BCORP-4-3                    | BV679036                     | b            |
| BCORP-4-4                    | BV679037                     | b            |
| BCORP-4-5                    | BV679038                     | b            |
| BCORP-4-6                    | BV679039                     | b            |
| NLGN4Y-1                     | BV679040                     | c            |
| NLGN4Y-2                     | BV679041                     |              |
| NLGN4Y-3                     | BV679042                     |              |
| NLGN4Y-4                     | BV679043                     |              |
| NLGN4Y-5-1                   | BV679044                     | b            |
| NLGN4Y-5-2                   | BV679045                     | b            |
| PRKY-2                       | BV679046                     |              |
| PRKY-3                       | BV679047                     |              |
| PRKY-4                       | BV679048                     |              |
| PRKY-5                       | BV679049                     |              |
| PRKY-7                       | BV679050                     |              |
| RPS4Y-1                      | BV679051                     | a            |
| RPS4Y-2                      | BV679052                     | a            |
| RPS4Y-3                      | BV679053                     | a            |
| RPS4Y-4                      | BV679054                     | a            |
| RPS4Y-5                      | BV679055                     | a            |
| RPS4Y-6                      | BV679056                     | a            |
| RPS4Y-7                      | BV679057                     | a            |
| RPS4Y2-1                     | BV679058                     |              |
| RPS4Y2-2                     | BV679059                     |              |
| RPS4Y2-3                     | BV679060                     |              |
| RPS4Y2-4                     | BV679061                     |              |
| RPS4Y2-5                     | BV679062                     |              |
| RPS4Y2-6                     | BV679063                     |              |
| RPS4Y2-7                     | BV679064                     |              |
| SMCY-1                       | BV679065                     | a            |
| SMCY-2                       | BV679066                     | a            |
| SMCY-3                       | BV679067                     | a            |
| SMCY-4                       | BV679068                     | a            |

| STS Name <sup>a</sup> | GenBank   |       |
|-----------------------|-----------|-------|
|                       | Accession | Notes |
| SMCY-5                | BV679069  | a     |
| SMCY-6                | BV679070  | a     |
| SMCY-7                | BV679071  | a     |
| SMCY-8                | BV679072  | a     |
| SMCY-10               | BV679073  | a     |
| SMCY-11               | BV679074  | a     |
| SMCY-12               | BV679075  | a     |
| SMCY-13               | BV679076  | a     |
| SMCY-14               | BV679077  | a     |
| SMCY-15               | BV679078  | a     |
| SMCY-16               | BV679079  | a     |
| SMCY-17               | BV679080  | a     |
| SMCY-18               | BV679081  | a     |
| SMCY-19               | BV679082  | a     |
| SMCY-20               | BV679083  | a     |
| SMCY-21               | BV679084  | a     |
| SMCY-22               | BV679085  | a     |
| SMCY-23               | BV679086  | a     |
| SMCY-24               | BV679087  | a     |
| SMCY-25               | BV679088  | a     |
| SMCY-26               | BV679089  | a     |
| SMCY-27               | BV679090  | a     |
| SRY-flank-1           | BV679091  | d     |
| SRY-flank-2           | BV679092  | d     |
| SRY-flank-3           | BV679093  | d     |
| SRY-flank-4           | BV679094  | d     |
| SRY-1-1               | BV679095  | b     |
| SRY-1-2               | BV679096  | b     |
| SRY-1-3               | BV679097  | b     |
| SRY-1-4               | BV679098  | b     |
| SRY-1-5               | BV679099  | b     |
| SRY-1-6               | BV679100  | b     |
| STSP-2                | BV679101  |       |
| STSP-3                | BV679102  |       |
| STSP-4                | BV679103  |       |
| STSP-5                | BV679104  |       |
| STSP-6                | BV679105  |       |
| STSP-9                | BV679106  |       |
| TBL1Y-2               | BV679107  | c     |
| TBL1Y-3               | BV679108  | c     |
| TBL1Y-6               | BV679109  |       |
| TBL1Y-7               | BV679110  |       |
| TBL1Y-8               | BV679111  |       |
| TBL1Y-9               | BV679112  |       |
| TBL1Y-10              | BV679113  |       |
| TBL1Y-11              | BV679114  |       |
| TBL1Y-12              | BV679115  |       |
| TBL1Y-13              | BV679116  |       |
| TBL1Y-14              | BV679117  |       |
| TBL1Y-15              | BV679118  |       |
| TBL1Y-16              | BV679119  |       |
| TBL1Y-17              | BV679120  |       |

| <b>STS Name</b> <sup>a</sup> | <b>GenBank<br/>Accession</b> | <b>Notes</b> |
|------------------------------|------------------------------|--------------|
| TBL1Y-18                     | BV679121                     |              |
| TMSB4Y-1                     | BV679122                     |              |
| TMSB4Y-2                     | BV679123                     |              |
| USP9Y-2                      | BV679124                     | c            |
| USP9Y-3                      | BV679125                     |              |
| USP9Y-4                      | BV679126                     |              |
| USP9Y-5                      | BV679127                     |              |
| USP9Y-6                      | BV679128                     |              |
| USP9Y-7                      | BV679129                     |              |
| USP9Y-8                      | BV679130                     |              |
| USP9Y-9                      | BV679131                     |              |
| USP9Y-10                     | BV679132                     |              |
| USP9Y-11                     | BV679133                     |              |
| USP9Y-12                     | BV679134                     |              |
| USP9Y-13                     | BV679135                     |              |
| USP9Y-14                     | BV679136                     |              |
| USP9Y-15                     | BV679137                     |              |
| USP9Y-16                     | BV679138                     |              |
| USP9Y-17                     | BV679139                     |              |
| USP9Y-18                     | BV679140                     |              |
| USP9Y-19                     | BV679141                     |              |
| USP9Y-20                     | BV679142                     |              |
| USP9Y-21                     | BV679143                     |              |
| USP9Y-22                     | BV679144                     |              |
| USP9Y-23                     | BV679145                     |              |
| USP9Y-24                     | BV679146                     |              |
| USP9Y-25                     | BV679147                     |              |
| USP9Y-26                     | BV679148                     |              |
| USP9Y-27                     | BV679149                     |              |
| USP9Y-28                     | BV679150                     |              |
| USP9Y-29                     | BV679151                     |              |
| USP9Y-30                     | BV679152                     |              |
| USP9Y-31                     | BV679153                     |              |
| USP9Y-32                     | BV679154                     |              |
| USP9Y-33                     | BV679155                     |              |
| USP9Y-34                     | BV679156                     |              |
| USP9Y-35                     | BV679157                     |              |
| USP9Y-36                     | BV679158                     |              |
| USP9Y-37                     | BV679159                     |              |
| USP9Y-38                     | BV679160                     |              |
| USP9Y-39                     | BV679161                     |              |
| USP9Y-40                     | BV679162                     |              |
| USP9Y-41                     | BV679163                     |              |
| USP9Y-42                     | BV679164                     |              |
| USP9Y-43                     | BV679165                     |              |
| USP9Y-44                     | BV679166                     |              |
| USP9Y-45                     | BV679167                     |              |
| USP9Y-46                     | BV679168                     |              |
| UTY-1                        | BV679169                     |              |
| UTY-2                        | BV679170                     |              |
| UTY-3                        | BV679171                     |              |
| UTY-4                        | BV679172                     |              |

| STS Name <sup>a</sup> | GenBank   |       |
|-----------------------|-----------|-------|
|                       | Accession | Notes |
| UTY-5                 | BV679173  |       |
| UTY-6                 | BV679174  |       |
| UTY-7                 | BV679175  |       |
| UTY-8                 | BV679176  |       |
| UTY-9                 | BV679177  |       |
| UTY-10                | BV679178  |       |
| UTY-11                | BV679179  |       |
| UTY-12                | BV679180  |       |
| UTY-13                | BV679181  |       |
| UTY-14                | BV679182  |       |
| UTY-15                | BV679183  |       |
| UTY-16-1              | BV679184  | b     |
| UTY-16-2              | BV679185  | b     |
| UTY-17                | BV679186  |       |
| UTY-18                | BV679187  |       |
| UTY-19                | BV679188  |       |
| UTY-20                | BV679189  |       |
| UTY-21                | BV679190  |       |
| UTY-22                | BV679191  |       |
| UTY-23                | BV679192  |       |
| UTY-24                | BV679193  |       |
| UTY-25                | BV679194  |       |
| UTY-26                | BV679195  |       |
| UTY-27                | BV679196  |       |
| UTY-28                | BV679197  |       |
| ZFY-4                 | BV679198  |       |
| ZFY-5                 | BV679199  |       |
| ZFY-6                 | BV679200  |       |
| ZFY-7                 | BV679201  |       |
| ZFY-8                 | BV679202  |       |
| ZFY-9                 | BV679203  |       |
| ZFY-10                | BV679204  |       |

<sup>a</sup> For mnemonic purposes, we constructed STS names from (1) the gene or pseudogene name, (2) the exon or pseudoexon number, and (3) when multiple STSs were needed to cover an exon, the STS number within the exon. The official name of RPS4Y was subsequently changed to RPS4Y1, and the official name of SMCY was subsequently changed to JARID1D and then KDM5D.

<sup>b</sup> Multiple STSs needed to cover exon.

<sup>c</sup> Not coding.

<sup>d</sup> Genomic flank of SRY.

Rozen et al., Table S4. Detected sequence variants in Y-chromosomal single-copy genes and pseudogenes.

| Variant ID <sup>a</sup> | Gene or pseudogene name | Exon number | Se-quence class <sup>b</sup> | Sequence to left of variant | Variants | Sequence to right of variant | Mnemonic variant ID <sup>c,d</sup> |
|-------------------------|-------------------------|-------------|------------------------------|-----------------------------|----------|------------------------------|------------------------------------|
| PAGE S00004             | AMELY                   | 2           | I                            | GGCACTTTATGGTGCACATG        | T C      | TTGAGAAGAGATGAGAAAAG         | AMELY-12-43                        |
| PAGE S00001             | AMELY                   | 4           | 4                            | TATCTTTCTCTTAAGGTGCT        | C A      | ACCCCTTTGAAGTGGTACCA         | AMELY+108                          |
| PAGE S00002             | AMELY                   | 4           | 0                            | ACCACCAAATCATCCCCGTG        | G A      | TGTCCCAACAGCACCCCTG          | AMELY+208                          |
| PAGE S00003             | AMELY                   | 4           | 0                            | GCCTCCAATGTTCCCCCTGC        | G A      | GCCCCTGCCCCCATACTTC          | AMELY+497                          |
| PAGE S00005             | APXLP                   | 4           | P                            | GGTGGTCCCACCCGTCCTGC        | A C      | TCAGAGCCTGAAGACAGTTC         | APXLY+640                          |
| PAGE S00006             | APXLP                   | 4           | P                            | ACAGCCTGGACCCCTCTGGG        | C T      | GCCTCTGGTGGCCAAGTCC          | APXLY-875                          |
| PAGE S00010             | ARSDP                   | 2           | P                            | GAATCTTTGCCGGTGCTACT        | G C      | TTTTTATGCTTGCTTCTGAA         | ARSDP+72                           |
| PAGE S00008             | ARSDP                   | 3           | P                            | ATGACATTTGTGTGCTTTGC        | T C      | CAGAATGCCAAATATTGACC         | ARSDP+201-4                        |
| PAGE S00009             | ARSDP                   | 8           | P                            | GGTGGGAAGGGCATAGGAGG        | A G      | TGGGAAGATGGGATCCATGT         | ARSDP+598                          |
| PAGE S00011             | ARSDP                   | 9           | P                            | TCTGCTCTGTGTTCTCTTCA        | C T      | GGAATCAGGGTGATCGACAA         | ARSDP+742-9                        |
| PAGE S00095             | ARSDP                   | 9           | P                            | CTTCACGGAATCAGGGTGAT        | C T      | GACAACCGCAGCTTGGTGCC         | ARSDP+748                          |
| PAGE S00007             | ARSDP                   | 10          | P                            | AAGGGTAGGTGCCGCACTGT        | C T      | GAAGCATTGGCAGACCCTGA         | ARSDP+1089                         |
| PAGE S00025             | BCORP                   | 4           | P                            | CAAGTGGGCCAACCTCCAAC        | C T      | GTGCCTGTCAAGCAAAGCAG         | KIAA1575Y+687                      |
| PAGE S00026             | BCORP                   | 4           | P                            | TTTCTACCTGCCATCACCT         | C T      | GCTATTTTCAGTCCCCACATC        | KIAA1575Y-377                      |
| PAGE S00027             | BCORP                   | 4           | P                            | GGCTCCTGTTCCCCAGAAAC        | A T      | CTGTCTTTCTAGTTTGGAGCA        | KIAA1575Y-856                      |
| PAGE S00106             | BCORP                   | 4           | P                            | ACTGATCATGGACCACACAG        | G A      | CCTGAAACAGGAAGGGCTCC         | KIAA1575Y-891                      |
| PAGE S00107             | BCORP                   | 4           | P                            | AAATGCTTTTCAGCACAGCAG       | A G      | AACACTTGGCTTGGACAGGC         | KIAA1575Y-631                      |
| PAGE S00108             | BCORP                   | 4           | P                            | AGGTGATGGACTGGATGATA        | A G      | TACAACAGCAAAGTTCTTTT         | KIAA1575Y+472                      |
| PAGE S00109             | BCORP                   | 4           | P                            | CAGAGAAAGATCCCATTCCC        | A C      | TGAAAGAGCCTGCCACAAAG         | KIAA1575Y+1552                     |
| PAGE S00019             | BCORP                   | 10          | P                            | CCTAGAGCAGCTGCTGCTTC        | C T      | AGCTGGAAGCAGGGCTTGC          | FLJ20285+47+42                     |
| PAGE S00020             | BCORP                   | 12          | P                            | TGCATGAGTTTAATCCCACC        | G A      | CACATCTCTACTAGGCCTC          | FLJ20285+48-16                     |
| PAGE S00018             | BCORP                   | 13          | P                            | AATAGCTCTTGGGAGTTCTA        | C T      | GGCAGCTCTGTCTGTGGTGA         | FLJ20285+255                       |
| PAGE S00043             | CYORF15A                | 3           | 0                            | GCAAGCCCTAAACTCTTTT         | C T      | GACTCCAGAGGAGAAGCTGG         | M61/CYORF15A+326                   |
| PAGE S00096             | CYORF15A                | 3           | 0                            | ATTATTGATGCAAGCCCTAA        | A C      | CACTCTTTCGACTCCAGAGG         | M159/CYORF15A+317                  |
| PAGE S00012             | CYORF15B                | 2           | I                            | GGTATTTACATATTTTAAAT        | A T      | GAATATTATGTAAGAAAGTAA        | CYORF15B+126+20                    |
| PAGE S00098             | CYORF15B                | 3           | I                            | GAAGAGGTAAGAAGGTTTTA        | C T      | GTGACTAAATAATGAGTACT         | M118/CYORF15B+222+15               |
| M191                    | DDX3Y                   | 2           | I                            | TTTTCTTTTACAACCTGACTA       | G T      | ATGAAAATATGAGATATTTT         | M191/DDX3Y+103+108                 |
| PAGE S00099             | DDX3Y                   | 5           | 0                            | TTAACTTTGAGAAATATGAT        | G A      | ATATACCAGTAGAGGCAACC         | DDX3Y+487                          |
| PAGE S00014             | DDX3Y                   | 7           | I                            | AAACTAAATCAGACAGTTTA        | G A      | TTGGTTACTTCCATTAATAT         | DDX3Y+538-124                      |
| PAGE S00015             | DDX3Y                   | 8           | I                            | AGCCCTGTTGACTTTTCTAA        | C T      | GGATGCCAGATACACCTTAT         | DDX3Y+759+72                       |
| PAGE S00029             | DDX3Y                   | 8           | I                            | AATCAAGGGCATTTFAGAAC        | A C      | CTTTGTCTCTGTTAATATT          | M173/DDX3Y+674-52                  |
| PAGE S00100             | DDX3Y                   | 11          | I                            | GTAATTAGTTTCTCAGATCT        | A G      | ATAATCCAGTATCAACTGAG         | DDX3Y+1020-35                      |
| PAGE S00101             | DDX3Y                   | 11          | 0                            | GCCTTATAATTTTTTCAAGGA       | G C      | TGATTCACTTACTTTAGTGT         | DDX3Y+1313                         |
| PAGE S00102             | EIF1AY                  | 3           | I                            | CTTTTCAATAAAAAATTTGCC       | G A      | CAAAAAATGTCTCTGCTTTA         | EIF1AY+204+37                      |
| PAGE S00103             | EIF1AY                  | 4           | I                            | TTTTTTTTTTTTCACACTGGT       | G A      | AATAGTATACCTGTCTTGTG         | EIF1AY+205-93                      |
| PAGE S00016             | EIF1AY                  | 5           | I                            | AATTTGAAAGTAACCTGTGA        | A C      | ACAACCTGGTATATTTTGGT         | EIF1AY+256-57                      |
| PAGE S00017             | EIF1AY                  | 5           | I                            | TTTGGAAAAGATATTAATAA        | C T      | TGGAAATCTCTAATAAAAAAC        | EIF1AY+337+183                     |
| PAGE S00104             | EIF1AY                  | 6           | I                            | AATGGTGGGACTACAGGTT         | A G      | TATAATCAGTATGTCTGTTA         | EIF1AY+338-33                      |
| PAGE S00044             | KDM5D                   | 4           | I                            | TTCATCCATATTGTTTCTTA        | T C      | ACTTTCAGATTTGTGATTGAG        | M64/KDM5D+352-9                    |
| PAGE S00061             | KDM5D                   | 7           | I                            | CCATTTGCTCCTACCTGGCC        | A G      | TACCACACTCACAGTAAAAA         | KDM5D+658-160                      |
| PAGE S00045             | KDM5D                   | 10          | I                            | GTCTTGCTGAAATATATTTT        | A G      | TTTCAGGAGTGTAAACAGCC         | M69/KDM5D+1093-7                   |
| PAGE S00046             | KDM5D                   | 10          | I                            | TTCTGTTGTGGTAGTCTTAG        | T G      | TCTCATGGAGACATGAGTCC         | M70/KDM5D+1212+51                  |
| PAGE S00116             | KDM5D                   | 10          | I                            | TAGTTCATGAGACATGA           | G A      | TCCAAAGTATAGTGGGCTAT         | KDM5D+1213-48                      |
| PAGE S00117             | KDM5D                   | 12          | I                            | ACTTGACGTGTCTTCTGTCT        | A G      | CGTGAGCAGGGGTGAGCCGA         | KDM5D+1554-10                      |
| PAGE S00058             | KDM5D                   | 14          | I                            | TCCTACATCTGTTACAGCAT        | C G      | TAGAGACATCTTTGAGTTCA         | KDM5D+1717-76                      |
| PAGE S00059             | KDM5D                   | 23          | 0                            | TGCAGACGCTGGCTCAGACA        | G A      | CACCAAGCGTAGCCGGTGGGA        | KDM5D+3296                         |
| PAGE S00119             | KDM5D                   | 23          | 4                            | CCGTGTGCAGACGCTGGCTC        | A G      | GACAGACCAAGCGTAGCCG          | KDM5D+3291                         |
| M50                     | KDM5D                   | 24          | I                            | GGAAAGGGCTCTGGTAAGAC        | A G      | GGTGTGGTTTGGGTAGGCTG         | M50/KDM5D+4069+8                   |
| M54                     | KDM5D                   | 24          | 4                            | GTTCCTGCAGAGGCTGCC          | C T      | GTGCGGCTGCCGAGGGTGA          | M54/KDM5D+3768                     |
| PAGE S00041             | KDM5D                   | 24          | 4                            | CAAGGGCTGCTGGAGAATGG        | A G      | GACAGTGTGACCAGTCTTGA         | M49/KDM5D+4023                     |
| PAGE S00042             | KDM5D                   | 24          | I                            | CTCTGATCCCTGTTGGAAGC        | C T      | TGTGTCTACTCTGCTTCAGG         | M51/KDM5D+4000-114                 |
| PAGE S00060             | KDM5D                   | 24          | 0                            | GATTATGTCTCAGGTGGGCC        | G A      | AGAAGAAGAACATTATCAGG         | KDM5D+4433                         |
| PAGE S00023             | KALP                    | 7           | P                            | TGGGGTCTCCCGAGGAGCC         | G A      | GACATCCTTGTGCATCACTA         | KALP-260                           |
| PAGE S00105             | KALP                    | 7           | P                            | GACATCCTTGTGCATCACTA        | C G      | AATGTCTTTTGGAGCTGGAC         | KALP-239                           |
| PAGE S00024             | KALP                    | 11          | P                            | ATCCTTATTGGATGGAATAT        | G T      | ATTTCAATCTTGGCAGTGT          | KALP-65-76                         |
| rs56217212              | KALP                    | 11          | P                            | AATATTATTTCAATCTTGC         | C A      | AGTGTTTTTTAATCCCTAAT         | KALP-65-61                         |
| PAGE S00021             | KALP                    | 12          | P                            | TTCTTCTGAGTGTATCTTTT        | G C      | CAAGTATTAACACAACACAA         | KALP+327+146                       |
| PAGE S00022             | KALP                    | 13          | P                            | CCAGATGTGGAAGCTCCAC         | C T      | CTCTTCAGCACACAGTGAGT         | KALP+455                           |
| PAGE S00048             | NLGN4Y                  | 3           | I                            | ATGTAATAGCATTAGTCAAG        | T A      | TACTTAGAACTCTTATCAA          | NLGN4Y-32-164                      |
| PAGE S00047             | NLGN4Y                  | 4           | 4                            | TCTGTAGGGTTTTTAAGTAC        | C T      | GGTGACCAGGCAGCAAAGG          | NLGN4Y+135                         |
| PAGE S00110             | NLGN4Y                  | 5           | 4                            | TGGACGAACTTCGCCAAAAC        | T C      | GGGTACGTTCTTCTTCATGT         | NLGN4Y+1095                        |
| PAGE S00049             | PRKY                    | 2           | I                            | CAGGAGACTTAATGACCTCT        | G A      | TCGATTTCTTCTCTCCAG           | PRKY+167-21                        |
| PAGE S00050             | PRKY                    | 7           | I                            | ATTCTGTACTGACGACAC          | G A      | TGTTGTTTCTTTTGAAGAAC         | PRKY+816-18                        |
| PAGE S00052             | RPS4Y1                  | 5           | I                            | TATAACTTTGTTTTTGTGG         | T G      | TTTTTTTTGTTTTTTTAGT          | RPS4Y1+81+26                       |
| PAGE S00113             | RPS4Y1                  | 7           | I                            | GACTCCTAGGCTGCTAAAAC        | G A      | TTCTCAGGTTCAACCTGGCA         | RPS4Y1+263-98                      |
| PAGE S00114             | RPS4Y1                  | 8           | 2                            | GATGCTCGAACCATCCGCTA        | C T      | CCAGATCCTGTCTCAAGGT          | RPS4Y1+447                         |
| PAGE S00051             | RPS4Y1                  | 10          | 4                            | GGCAATAAACCTTGATTTT         | C T      | CTGCCAGGGGAAAGGGCAT          | RPS4Y1+711                         |
| PAGE S00115             | RPS4Y1                  | 10          | I                            | ATGTGTGTTTTGGTGGGATG        | T C      | TGTTTTTCTCTCCTCCCTTT         | RPS4Y1+691-58                      |
| PAGE S00054             | RPS4Y2                  | 2           | I                            | CTCCTCCGATCCGGTATTAC        | C T      | CGTTAGCAGTTGTTACAGCT         | RPS4Y2+4-87                        |
| PAGE S00053             | RPS4Y2                  | 3           | I                            | AAGTGAAGCTGGAAGGG           | G A      | TTGGTAATGTAATGGGATGA         | RPS4Y2+262+195                     |
| PAGE S00056             | RPS4Y2                  | 3           | 4                            | CTACAGGCACCTCGTCCATC        | G A      | ACAGGTCTCACAAGCTGAG          | RPS4Y2+96                          |
| PAGE S00055             | RPS4Y2                  | 7           | 4                            | GAGAGAGACAAGAGGCTGGC        | T C      | GCCAAACAGAGCAGTGGCTA         | RPS4Y2+771                         |



| Variant ID <sup>a</sup> | Gene or pseudogene name | Exon number | Se-quence class <sup>b</sup> | Sequence to left of variant | Variants | Sequence to right of variant | Mnemonic variant ID <sup>c,d</sup> |
|-------------------------|-------------------------|-------------|------------------------------|-----------------------------|----------|------------------------------|------------------------------------|
| PAGE S00063             | SRY                     | 1           | 2                            | CCCGCTTCGGTACTCTGCAG        | C T      | GAAGTGCAACTGGACAACAG         | SRY+465                            |
| PAGE S00068             | STSP                    | 3           | P                            | ACGTTGGGGGTTGCAGTGAG        | C T      | GGAGATCGCACTACTGCACT         | STSP-311-113                       |
| PAGE S00121             | STSP                    | 3           | P                            | GGTTGCAGTGAGCGGAGATC        | G A      | CACTACTGCACTCCATCCTG         | STSP-311-105                       |
| PAGE S00069             | STSP                    | 5           | P                            | CCCCATTTGTCTTCTCAGA         | G T      | AAATGGCACATTGGGATAAG         | STSP-78                            |
| PAGE S00066             | STSP                    | 6           | P                            | GCTTGCTTTGTCTACCTCC         | A G      | CGTGACATGGCCTTGTCT           | STSP+382                           |
| PAGE S00067             | STSP                    | 6           | P                            | GTGTGGGTATGTCTCTCCTC        | G A      | GTGAATACTTAGAAAGCTGC         | STSP+477+15                        |
| PAGE S00122             | TBL1Y                   | 3           | I                            | GGCTAATCATTTTTTTTCTCT       | C T      | TTTATAGGCATTGATGTCTCT        | TBL1Y-265-8                        |
| PAGE S00073             | TBL1Y                   | 8           | I                            | TATGCTCCACTTCCCGTGC         | C G T    | TCTCCTGCCAGAGAGTAGA          | TBL1Y+205-82                       |
| PAGE S00074             | TBL1Y                   | 8           | I                            | CACATGAAATCAGTGAGTGC        | G A      | CAGGCTCTGGAAGTTTGGTG         | TBL1Y+457+9                        |
| PAGE S00075             | TBL1Y                   | 9           | I                            | GCCACAATTTAGTTAGACTC        | G A      | TTAGAGGTAGTGTACTTAG          | TBL1Y+458-118                      |
| PAGE S00076             | TBL1Y                   | 10          | I                            | TGATAAAGACAGAAGAGCAC        | A G      | TGCCTACAATGTCACCTGGC         | TBL1Y+591-96                       |
| PAGE S00071             | TBL1Y                   | 16          | I                            | GTTGGCAAGGTAAGGCCGG         | C A      | AGCACAACCTGGTACAGCTCC        | TBL1Y+1280+12                      |
| PAGE S00072             | TBL1Y                   | 18          | 4                            | CACAGCTACCAAGGCACTGG        | C A      | GGTATCTTCGAGGTGTGCTG         | TBL1Y+1482                         |
| PAGE S00080             | USP9Y                   | 4           | 2                            | CCACAGCATGAAGATGAAGA        | T G      | CCTGCATTTCCACATACTGA         | USP9Y+195                          |
| PAGE S00031             | USP9Y                   | 7           | 0                            | CTGAAGATGAATTAATTTGCT       | C T      | GTTCTTCAGATCCTCGATCA         | M179/USP9Y+631                     |
| M70                     | USP9Y                   | 8           | I                            | TTACTTAAAAATCATTTGTTT       | A C      | TTTTTTTTTTCAGTGTGGGTTGT      | M170/USP9Y+773+131                 |
| PAGE S00078             | USP9Y                   | 8           | I                            | GGTTAATAAATGATTAGTT         | G C      | TTTGAAACTGTTGAGGTAAC         | USP9Y+1164+167                     |
| PAGE S00032             | USP9Y                   | 12          | 2                            | CAACTTGATCATCTTTTGA         | T C      | TGCTTTAAGGTAGTAGCTTG         | M181/USP9Y+1413                    |
| PAGE S00079             | USP9Y                   | 13          | I                            | TCTCGGCTTACTGCAAGCTC        | C T      | GCCTCTCGGTTTCATGCCAT         | USP9Y+1629+174                     |
| PAGE S00081             | USP9Y                   | 17          | I                            | CACATTTTAAATTCAGATA         | C T      | GTGTTTAAACAATTTATTTTG        | USP9Y+1989-149                     |
| PAGE S00033             | USP9Y                   | 19          | 4                            | CACAAGGAAAGAATGATTCT        | A C      | CCTATGTCGAGGTTTGTGTG         | M183/USP9Y+2628                    |
| PAGE S00082             | USP9Y                   | 20          | 4                            | GCATTCGTTGGCAACACCT         | C T      | TCTCTTATAGTTTCGGTTTCC        | USP9Y+2661                         |
| PAGE S00034             | USP9Y                   | 23          | 0                            | CAGCTGTAGAAAAATTACGA        | G A      | CTGTTTGTGTTGGACCATGCA        | M184/USP9Y+3178                    |
| PAGE S00083             | USP9Y                   | 23          | I                            | ATGTGAAACATTAATAACAC        | A G      | TGAGTTACACTTTATTTTAG         | USP9Y+3152-43                      |
| PAGE S00123             | USP9Y                   | 23          | I                            | ATTTCTTAGCAATGATCAGA        | G A      | GAGAAATAGATGTTACTAAG         | USP9Y+3283-72                      |
| PAGE S00084             | USP9Y                   | 25          | 2                            | ATTCCTAATCCCTCATCCGA        | G A      | TGCGTACTTAGAAATGAGTC         | USP9Y+3636                         |
| PAGE S00070             | USP9Y                   | 29          | I                            | AGTGTAGACTTGTGAATCA         | T C      | GTTGTTTTAATTTAATATTT         | Tat/USP9Y+4093-24                  |
| M188                    | USP9Y                   | 31          | 4                            | ATTCAGTCTGTAGTTCACC         | C T      | GTTACCATCAATGCCGTTT          | M188/USP9Y+4491                    |
| PAGE S00085             | USP9Y                   | 31          | I                            | TTTTTGTGGGTTTTGTTTT         | G T      | AGATATAATGAGATATTTAA         | USP9Y+4387-122                     |
| PAGE S00086             | USP9Y                   | 31          | I                            | TTACATTTATTAATTGTACT        | C T      | GGGTTTTTTTTGTGGGTTTT         | USP9Y+4387-148                     |
| PAGE S00124             | USP9Y                   | 32          | I                            | TATTAATTTGTTAGCTGAA         | A C      | ATGGTGAACAGAATCACTGT         | USP9Y+4610-58                      |
| PAGE S00087             | USP9Y                   | 33          | I                            | AATGTATTTTTTTAACTATT        | C T      | TTTTATGATACTTATCTGT          | USP9Y+4831-204                     |
| PAGE S00125             | USP9Y                   | 36          | I                            | TATATGAATGTGTGGCTTT         | T C      | TTGGTATAGTTATTTTAAAA         | USP9Y+6088+157                     |
| PAGE S00030             | USP9Y                   | 38          | 4                            | GAATACCTTCTGGAGTGCCC        | T C      | AGTGCAGAAGTGAGGGGTGC         | M174/USP9Y+6327                    |
| PAGE S00126             | USP9Y                   | 40          | I                            | TTTTAATTATTCAGTACTT         | A C      | CCCTCTTAGTTTTTTTTTCT         | USP9Y+6569-50                      |
| rs13304344              | USP9Y                   | 40          | I                            | TGCAGTACTTACCCTCTTAG        | T C      | TTTTTTTTTCTACATATTATT        | USP9Y+6569-40                      |
| PAGE S00035             | USP9Y                   | 43          | I                            | CTGACTGAAAATCATTCT          | A G      | AATTCATAAATAGTTTTATT         | M190/USP9Y+7222-31                 |
| PAGE S00088             | USP9Y                   | 43          | I                            | ATGGCACAATAATTAGGAAC        | C G      | AAATGTTAGCTACTATTGGA         | USP9Y+7065-54                      |
| PAGE S00089             | USP9Y                   | 43          | 4                            | TTCGATACAATACAGCGCTC        | G A      | AAGAATCACTATCAAAAACG         | USP9Y+7131                         |
| PAGE S00090             | USP9Y                   | 43          | I                            | TTTTTCTCTTATAAATTTGT        | A G      | GAAACCTCTGTCACAAGTAA         | USP9Y+7221+28                      |
| PAGE S00127             | USP9Y                   | 43          | I                            | GATACTGAAAATCATCTAA         | A G      | TTCTAAATAGTTTTATTTTT         | USP9Y+7222-29                      |
| PAGE S00028             | USP9Y                   | 45          | I                            | CCAAACCCATTTTGATGCTT        | T G      | ACTTAAAAGGCTTCAATTA          | M172/USP9Y+7530+48                 |
| PAGE S00036             | UTY                     | 1           | 4                            | TTTGTGTTTCCATGAAATC         | C G      | TGCGCAGTGTGCTCACTAC          | M203/UTY+9                         |
| PAGE S00037             | UTY                     | 3           | I                            | AAGGTATTGTTATTTCTCTT        | T C      | TAAATTTCTTGCTTGACTTA         | M207/UTY+325+18                    |
| PAGE S00038             | UTY                     | 5           | I                            | AACTTAAAACATCTCGTTAC        | A G      | TGACTTCTTATTAATATATG         | M213/UTY+376-78                    |
| PAGE S00093             | UTY                     | 9           | I                            | AACATATTAGTATGTAAAT         | C A      | TTCATTGCTAGCTATTTTAA         | UTY+646-206                        |
| PAGE S00129             | UTY                     | 11          | I                            | ATTAATAAATCATATAAAT         | G A      | TACATCGACAATGTAAAATC         | UTY+867-155                        |
| PAGE S00039             | UTY                     | 12          | I                            | AGACACTGTCTGAAAACAAC        | A G      | GAAAAATAAACGAACGAAAG         | M214/UTY+966-59                    |
| PAGE S00091             | UTY                     | 13          | I                            | TGACGATCTTTCCCCAATT         | C T      | GAAAGCAGTAGAACAGTAA          | UTY+1278+33                        |
| PAGE S00040             | UTY                     | 14          | 2                            | CAGCTGGAACAGTTAGAAAG        | T C      | CAGTTTGTCTTAATGCAGCA         | M215/UTY+1353                      |
| PAGE S00130             | UTY                     | 23          | I                            | ACTGCTCAGCAGAAATTTTT        | T A      | AAAATGATTTGATTTCAAAT         | UTY+3389+124                       |
| PAGE S00092             | UTY                     | 25          | I                            | AGAATTGGTATTGCAGTTGT        | C T      | ACCTGAGAGGTGATAAATGA         | UTY+3578-84                        |
| PAGE S00131             | ZFY                     | 5           | 0                            | TTACTTCAACCTCAATGTCT        | A G      | TGCCAGAACATGTTTTAACG         | ZFY+391                            |
| PAGE S00094             | ZFY                     | 9           | I                            | ATAAAGCAGGTATAATTTAC        | C T      | GAGAAGTGGAGAAGTACCT          | ZFY+1222+280                       |

<sup>a</sup> dbSNP submitter ID, dbSNP rs#, or YCC "M" ID.

<sup>b</sup> 0=coding non-degenerate; 2=coding twofold degenerate; 4=coding fourfold degenerate; I=intron; P=pseudogene.

<sup>c</sup> Mnemonic identifier, which is also used in Figures S1 through S4.

The purpose of these identifiers is to make it somewhat easier to determine at a glance the gene in which a particular variant occurs and to determine whether it is coding or intronic. However, the information submitted to dbSNP, rather than the positions represented in the mnemonic identifiers, provide the definitive references for the variants.

The mnemonic identifiers have three possible forms:  $[Mm/]G+P$ ,  $[Mm/]G+P+I_{after}$ , or  $[Mm/]G+P-I_{before}$ , where

$[Mm/]$  is an optional YCC "M" ID for previously named variants (main text refs. 2 and 3) that we detected in our survey, followed by the character "/",

$G$  is a gene or pseudogene name,

$P$  is a nucleotide position in  $G$ 's coding sequence,

$+I_{after}$  indicates a position in the intron following the exon that ends at  $P$ , with position +1 assigned to the first nucleotide after the end of the exon, and

$-I_{before}$  indicates a position in the intron preceding the exon that starts at  $P$ , with the position of the variant reckoned backward (5') from the exon starting at  $P$  and with position -1 assigned to the last intronic nucleotide before the exon.

<sup>d</sup> FLJ20285 and KIAA1575Y represent parts of BCORP, which we did not initially recognize as homologous to a single X-chromosome gene.

**Rozen et al., Table S5.** The human Y-chromosome's X-degenerate genes show much lower variability at non-degenerate sites than at four-fold degenerate sites, in introns and in pseudogenes. This table is similar to Table 3 in the main text, except that rather than examining non-synonymous and synonymous sites, it examines non-degenerate sites—coding nucleotide sites at which any substitution would lead to a change in the encoded amino acid—and four-fold degenerate sites—coding sites at which any substitution would leave the amino acid unchanged. This analysis excludes two-fold degenerate sites, at which two of the three possible nucleotide substitutions would change the encoded amino acid while the third would leave it unchanged. For rows other than those with *P* values, the columns for introns and pseudogenes contain the same data as in main text Table 3.

|                                                                                                   | <b>Non-degenerate</b> | <b>Four-fold degenerate</b> | <b>Intron</b>         | <b>Pseudogene</b>     | <b>Four-fold degenerate, intron, &amp; pseudogene</b> |
|---------------------------------------------------------------------------------------------------|-----------------------|-----------------------------|-----------------------|-----------------------|-------------------------------------------------------|
| Variant nucleotides                                                                               | 11                    | 16                          | 64                    | 29                    | 109                                                   |
| Invariant nucleotides                                                                             | 17,472                | 3,760                       | 40,265                | 15,222                | 59,247                                                |
| Total nucleotides                                                                                 | 17,483                | 3,776                       | 40,329                | 15,251                | 59,356                                                |
| <b>Proportion of variant sites</b>                                                                | $6.29 \times 10^{-4}$ | $4.24 \times 10^{-3}$       | $1.59 \times 10^{-3}$ | $1.90 \times 10^{-3}$ | $1.84 \times 10^{-3}$                                 |
| <i>P-values of proportions of variant versus invariant sites (Fisher's exact test, two sided)</i> |                       |                             |                       |                       |                                                       |
| Non-degenerate vs. ...                                                                            |                       | $1.7 \times 10^{-6}$        | $2.4 \times 10^{-3}$  | $1.2 \times 10^{-3}$  | $1.8 \times 10^{-4}$                                  |
| Four-fold degenerate vs. ...                                                                      |                       |                             | $1.1 \times 10^{-3}$  | $1.4 \times 10^{-2}$  |                                                       |
| Intron vs. ...                                                                                    |                       |                             |                       | 0.42                  |                                                       |
| <b>Nucleotide diversity</b>                                                                       | $2.62 \times 10^{-5}$ | $2.34 \times 10^{-4}$       | $1.22 \times 10^{-4}$ | $9.8 \times 10^{-5}$  | $1.23 \times 10^{-4}$                                 |
| <i>P-values of differences in diversities (Wilcoxon rank sum test, two sided)</i>                 |                       |                             |                       |                       |                                                       |
| Non-degenerate vs. ...                                                                            |                       | $1.6 \times 10^{-8}$        | $3.3 \times 10^{-3}$  | $1.0 \times 10^{-3}$  | $3.8 \times 10^{-4}$                                  |
| Four-fold degenerate vs. ...                                                                      |                       |                             | $2.5 \times 10^{-4}$  | $8.2 \times 10^{-2}$  |                                                       |
| Intron vs. ...                                                                                    |                       |                             |                       | 0.42                  |                                                       |
